# Supplementary material for: Flame-retardant MXene/polyimide film with outstanding thermal and mechanical properties based on the secondary orientation strategy
Source: Royal Society of Chemistry journal article supplement (doi:10.1039/d1na00415h), 2021-01-01
Supplement: d1na00415h3.pdf [file d1na00415h3.pdf]

## *Supplementary Information*

### **Flame-retardant MXene/Polyimide Film with Outstanding Thermal and Mechanical Properties Based on the Secondary Orientation Strategy**

Yue Zhu<sup>I#</sup>, Qingyu Peng<sup>\*I II#</sup>, Haowen Zheng<sup>I</sup>, Fuhua Xue<sup>I</sup>, Pengyang Li<sup>I</sup>, Zhonghai Xu<sup>I</sup>, Xiaodong He<sup>I II</sup> and Xingbin Zhao<sup>I</sup>

<sup>I</sup> National Key Laboratory of Science and Technology on Advanced Composites in Special Environments, Center for Composite Materials and Structures, Harbin Institute of Technology, Harbin 150080, P. R. China

<sup>II</sup> Shenzhen STRONG Advanced Materials Research Institute Co., Ltd., Shenzhen 518000, P. R. China

\*Corresponding authors. Email: [pengqingyu@hit.edu.cn](mailto:pengqingyu@hit.edu.cn)

# These authors contributed equally to this work.

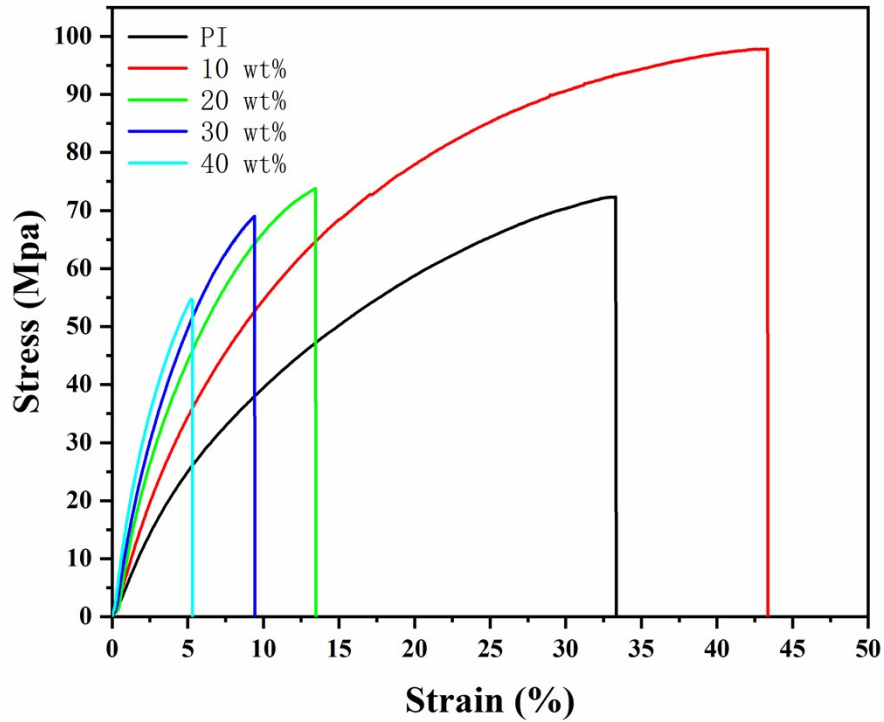

**Fig. S1** Typical stress-strain curves of PI film and MXene/PI films.

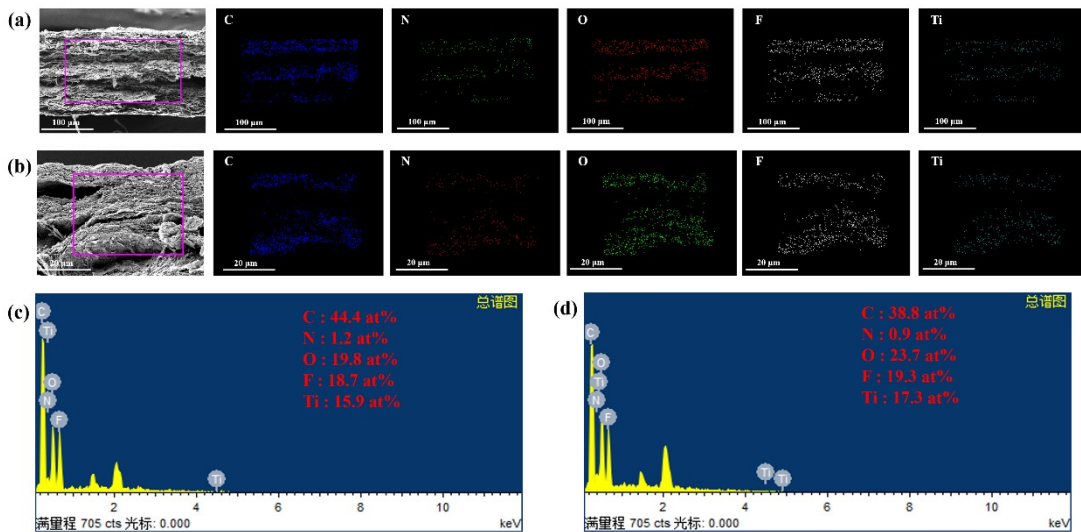

**Fig. S2** SEM images of a) MXene/PI film, b) burned MXene/PI film and energy dispersive spectroscopy (EDS) mapping images of C, N, O, F, and Ti elements. EDS element spectrum and atomic percentage of c) MXene/PI and d) burned MXene/PI.

**Table S1 Micro-scale Combustion Calorimeter (MCC) data of all samples.**

| Sample      | HR Capacity<br>(J/g-K) | Peak HRR<br>(W/g) | Total HR<br>(kJ/g) | Temperature<br>(°C) |
|-------------|------------------------|-------------------|--------------------|---------------------|
| PI          | 75                     | 47.6              | 0.9                | 556                 |
| MXene-10/PI | 54                     | 37                | 0.8                | 562.1               |
| MXene-20/PI | 28                     | 22.7              | 0.8                | 563.1               |
| MXene-30/PI | 27                     | 16.9              | 0.9                | 565.7               |
| MXene-40/PI | 26                     | 12.8              | 0.7                | 572.7               |

**Table S2 Comparison of properties of different PI composite materials.**

| Materials                    | Preparation method/condition | Thermal conductivity<br>(W m <sup>-1</sup> k <sup>-1</sup> ) | Tensile strength<br>(MPa) | Literature |
|------------------------------|------------------------------|--------------------------------------------------------------|---------------------------|------------|
| BN/PI film                   | Casting method               | 1.16                                                         | ~69.6                     | 1          |
| AlN/BN/PI film               | Casting method               | 0.711                                                        | ~120.1                    | 2          |
| NH <sub>2</sub> -rGO/PI film | Knife Coating method         | 7.13                                                         | 35.7                      | 3          |
| CNF/hBN/PI film              | Dip Coating method           | 0.627                                                        | ~70                       | 4          |
| G/PI film                    | Knife Coating method         | 0.2275                                                       | ~127.5                    | 5          |
| PI/GO/BN film                | Casting method               | 11.203                                                       | —                         | 6          |
| rGO/PI film                  | Casting method               | 2.78                                                         | —                         | 7          |
| BN/PI film                   | Casting method               | 2.58                                                         | —                         | 8          |
| PI/CNNS film                 | Solution Casting method      | 2.04                                                         | —                         | 9          |
| Hyperbranched PI film        | Knife Coating method         | —                                                            | 124.1                     | 10         |
| PI/FGS film                  | Casting method               | —                                                            | ~122                      | 11         |

|                      |                                       |              |             |                 |
|----------------------|---------------------------------------|--------------|-------------|-----------------|
| ZnS-MPTMS/PI film    | Knife Coating method                  | —            | ~87.7       | 12              |
| FG/PI film           | Casting method                        | —            | 65.76       | 13              |
| <b>MXene/PI film</b> | <b>Secondary Orientation Strategy</b> | <b>~5.12</b> | <b>~102</b> | <b>Our work</b> |

## REFERENCES

- [1] Zhang, G.-D.; Fan, L.; Bai, L.; He, M.-H.; Zhai, L.; Mo, S. Mesoscopic Simulation Assistant Design of Immiscible Polyimide/BN Blend Films with Enhanced Thermal Conductivity. *Chinese J. Polym. SCI* **2018**, *36* (12), 1394-1402.
- [2] Liu, L.; Cao, C.; Ma, X.; Zhang, X.; Lv, T. Thermal conductivity of polyimide/AlN and polyimide/(AlN plus BN) composite films prepared by in-situ polymerization. *J. Macromol. SCI A* **2020**, *57* (5), 398-407.
- [3] Ruan, K.; Guo, Y.; Lu, C.; Shi, X.; Ma, T.; Zhang, Y.; Kong, J.; Gu, J. Significant Reduction of Interfacial Thermal Resistance and Phonon Scattering in Graphene/Polyimide Thermally Conductive Composite Films for Thermal Management. *Research* **2021**, *2021*.
- [4] Haruki, M.; Tanaka, K. Controlling thermal conductivities and electrical insulation properties of carbon nanofiber/polyimide composites using surface coating techniques. *Polymer Composite* **2020**, *41* (8), 2990-2997.
- [5] Wang, R.; Chen, M.; Li, Q.; Li, W.; Guo, Y.; Liu, L. Enhanced Mechanical and Thermal Properties of Polyimide Films Based on Functional Groups-Free Few-Layer Graphene. *J. Chem. Eng. JPN* **2019**, *52* (6), 570-578.
- [6] He, X.; Wang, Y. Highly Thermally Conductive Polyimide Composite Films with Excellent Thermal and Electrical Insulating Properties. *Ind. Eng. Chem. Res.* **2020**, *59* (5), 1925-1933.

- [7] Wei, S.; Yu, Q.; Fan, Z.; Liu, S.; Chi, Z.; Chen, X.; Zhang, Y.; Xu, J. Fabricating high thermal conductivity rGO/polyimide nanocomposite films via a freeze-drying approach. *RSC Adv.* **2018**, *8* (39), 22169-22176.
- [8] Du, B. X.; Xiao, M. Effects of Thermally Conducting Particles on Resistance to Tracking Failure of Polyimide/BN Composites. *IEEE T. Dielect. E. L. In.* **2014**, *21* (4), 1565-1572.
- [9] Wang, Y.; Zhang, X.; Ding, X.; Zhang, P.; Shu, M.; Zhang, Q.; Gong, Y.; Zheng, K.; Tian, X. Imidization-induced carbon nitride nanosheets orientation towards highly thermally conductive polyimide film with superior flexibility and electrical insulation. *Compos. B. Eng.* **2020**, *199*.
- [10] Lei, X.; Qiao, M.; Tian, L.; Chen, Y.; Zhang, Q. Tunable Permittivity in High-Performance Hyperbranched Polyimide Films by Adjusting Backbone Rigidity (vol 120, pg 2548, 2016). *J. Phys. Chem. C* **2016**, *120* (40), 23304-23304.
- [11] Nguyen Dang, L.; Hippel, U.; Korhonen, J. T.; Soininen, A. J.; Ruokolainen, J.; Johansson, L.-S.; Nam, J.-D.; Sinh, L. H.; Seppala, J. Enhanced mechanical and electrical properties of polyimide film by graphene sheets via in situ polymerization. *Polymer* **2011**, *52* (23), 5237-5242.
- [12] Jeon, H.; Yoon, C.; Song, Y.-G.; Han, J.; Kwon, S.; Kim, S.; Chang, I.; Lee, K. Reducing the Coefficient of Thermal Expansion of Polyimide Films in Microelectronics Processing Using ZnS Particles at Low Concentrations. *ACS Appl. Nano Mater.* **2018**, *1* (3), 1076-1082.
- [13] Zhang, P.; Zhang, K.; Chen, X.; Dou, S.; Zhao, J.; Li, Y. Mechanical, dielectric and thermal properties of polyimide films with sandwich structure. *Compos. Struct.* **2021**, *261*.
